# Supplementary material
Source: MDPI journal article supplement (https://www.mdpi.com/2311-5637/7/4/290)
Supplement: s1 [file s1]

**Table S1.** Volatile compounds produced by the ten different *Saccharomyces* strains in 1 L fermentation

| Volatile compounds           | G 4                       | G 354                      | G 450                      | G 487                       | G 502                      | G 520                     | CLI 70                      | CLI 275                     | CLI 1056                  | CLI 1109                  | S-04                       |
|------------------------------|---------------------------|----------------------------|----------------------------|-----------------------------|----------------------------|---------------------------|-----------------------------|-----------------------------|---------------------------|---------------------------|----------------------------|
| <b>Higher alcohols</b>       |                           |                            |                            |                             |                            |                           |                             |                             |                           |                           |                            |
| 1-propanol                   | nd                        | nd                         | nd                         | nd                          | nd                         | nd                        | nd                          | nd                          | nd                        | nd                        | nd                         |
| Isobutanol                   | 3.70 ± 0.31 <sup>e</sup>  | 15.29 ± 0.14 <sup>b</sup>  | 10.77 ± 1.76 <sup>cd</sup> | 14.26 ± 0.74 <sup>bc</sup>  | 7.58 ± 0.50 <sup>de</sup>  | 25.71 ± 0.90 <sup>a</sup> | 14.42 ± 1.87 <sup>bc</sup>  | 11.17 ± 0.46 <sup>bcd</sup> | 23.78 ± 1.82 <sup>a</sup> | 24.68 ± 1.59 <sup>a</sup> | 23.54 ± 2.78 <sup>a</sup>  |
| 1-butanol                    | nd                        | nd                         | nd                         | nd                          | nd                         | 0.02 ± 0.00 <sup>b</sup>  | nd                          | nd                          | nd                        | nd                        | 0.03 ± 0.00 <sup>a</sup>   |
| Isoamyl alcohol              | 29.77 ± 3.66 <sup>f</sup> | 69.38 ± 0.58 <sup>b</sup>  | 53.39 ± 1.38 <sup>de</sup> | 62.07 ± 1.58 <sup>bcd</sup> | 51.53 ± 8.59 <sup>e</sup>  | 97.73 ± 2.11 <sup>a</sup> | 58.32 ± 0.75 <sup>cde</sup> | 63.80 ± 2.15 <sup>bcd</sup> | 70.81 ± 1.93 <sup>b</sup> | 88.41 ± 2.45 <sup>a</sup> | 68.73 ± 5.45 <sup>bc</sup> |
| 1-hexanol                    | 0.05 ± 0.00 <sup>bc</sup> | 0.08 ± 0.00 <sup>c</sup>   | 0.08 ± 0.00 <sup>a</sup>   | 0.07 ± 0.02 <sup>ab</sup>   | 0.05 ± 0.00 <sup>c</sup>   | 0.05 ± 0.00 <sup>c</sup>  | 0.05 ± 0.00 <sup>bc</sup>   | 0.07 ± 0.00 <sup>ab</sup>   | 0.06 ± 0.01 <sup>bc</sup> | 0.05 ± 0.00 <sup>c</sup>  | 0.06 ± 0.00 <sup>bc</sup>  |
| Cis-3-hexenol                | nd                        | nd                         | nd                         | nd                          | nd                         | nd                        | nd                          | nd                          | nd                        | nd                        | nd                         |
| Methionol                    | 0.41 ± 0.02 <sup>c</sup>  | 0.05 ± 0.02 <sup>de</sup>  | 0.13 ± 0.00 <sup>de</sup>  | 0.09 ± 0.03 <sup>de</sup>   | 0.86 ± 0.01 <sup>a</sup>   | 0.79 ± 0.03 <sup>a</sup>  | 0.02 ± 0.00 <sup>e</sup>    | 0.61 ± 0.06 <sup>b</sup>    | 0.09 ± 0.01 <sup>de</sup> | 0.17 ± 0.11 <sup>d</sup>  | 0.82 ± 0.09 <sup>a</sup>   |
| Benzyl alcohol               | 0.01 ± 0.00 <sup>a</sup>  | nd                         | 0.01 ± 0.00 <sup>ab</sup>  | nd                          | nd                         | 0.01 ± 0.00 <sup>ab</sup> | nd                          | 0.00 ± 0.00 <sup>bc</sup>   | 0.01 ± 0.00 <sup>ab</sup> | 0.00 ± 0.00 <sup>bc</sup> | nd                         |
| β-phenylethanol              | 2.98 ± 0.37 <sup>i</sup>  | 9.98 ± 0.98 <sup>b</sup>   | 11.57 ± 0.11 <sup>gh</sup> | 20.91 ± 0.57 <sup>de</sup>  | 16.39 ± 0.67 <sup>ef</sup> | 52.99 ± 1.56 <sup>a</sup> | 11.70 ± 0.99 <sup>gh</sup>  | 23.07 ± 0.25 <sup>d</sup>   | 37.46 ± 2.58 <sup>c</sup> | 16.10 ± 0.06 <sup>g</sup> | 45.91 ± 4.09 <sup>b</sup>  |
| <b>Total Higher alcohols</b> | 36.93 ± 4.37              | 94.75 ± 1.73               | 75.93 ± 3.27               | 97.39 ± 2.94                | 76.41 ± 9.77               | 177.29 ± 4.60             | 84.50 ± 3.61                | 98.72 ± 2.92                | 132.21 ± 6.34             | 129.41 ± 4.22             | 139.08 ± 12.41             |
| <b>Esters</b>                |                           |                            |                            |                             |                            |                           |                             |                             |                           |                           |                            |
| Ethyl isobutirate            | nd                        | nd                         | nd                         | nd                          | nd                         | nd                        | nd                          | nd                          | nd                        | nd                        | 0.40 ± 0.15                |
| Ethyl butirate               | nd                        | 0.15 ± 0.01 <sup>abc</sup> | 0.13 ± 0.01 <sup>bcd</sup> | 0.06 ± 0.06 <sup>de</sup>   | 0.22 ± 0.01 <sup>a</sup>   | 0.16 ± 0.00 <sup>ab</sup> | 0.07 ± 0.07 <sup>cde</sup>  | 0.15 ± 0.01 <sup>abc</sup>  | nd                        | 0.21 ± 0.02 <sup>ab</sup> | 0.13 ± 0.00 <sup>bcd</sup> |
| Ethyl isovalerate            | 0.07 ± 0.00 <sup>f</sup>  | 0.20 ± 0.01 <sup>a</sup>   | 0.18 ± 0.01 <sup>bc</sup>  | 0.17 ± 0.00 <sup>c</sup>    | 0.14 ± 0.00 <sup>d</sup>   | 0.19 ± 0.01 <sup>ab</sup> | 0.14 ± 0.00 <sup>d</sup>    | 0.14 ± 0.01 <sup>d</sup>    | 0.09 ± 0.00 <sup>e</sup>  | 0.19 ± 0.00 <sup>ab</sup> | 0.19 ± 0.00 <sup>ab</sup>  |
| Isoamyl acetate              | 0.22 ± 0.01 <sup>e</sup>  | 0.61 ± 0.08 <sup>de</sup>  | 0.42 ± 0.17 <sup>e</sup>   | 0.40 ± 0.19 <sup>e</sup>    | 1.30 ± 0.10 <sup>c</sup>   | 2.34 ± 0.06 <sup>a</sup>  | 0.89 ± 0.17 <sup>cd</sup>   | 0.65 ± 0.04 <sup>de</sup>   | 0.40 ± 0.01 <sup>e</sup>  | 1.90 ± 0.32 <sup>ab</sup> | 1.81 ± 0.26 <sup>b</sup>   |
| Ethyl hexanoate              | 0.09 ± 0.02 <sup>c</sup>  | 0.01 ± 0.01 <sup>c</sup>   | 0.16 ± 0.00 <sup>a</sup>   | 0.09 ± 0.07 <sup>abc</sup>  | 0.03 ± 0.01 <sup>c</sup>   | 0.02 ± 0.00 <sup>c</sup>  | 0.07 ± 0.06 <sup>abc</sup>  | 0.01 ± 0.00 <sup>c</sup>    | 0.15 ± 0.01 <sup>ab</sup> | 0.60 ± 0.03 <sup>bc</sup> | 0.03 ± 0.00 <sup>c</sup>   |
| Hexyl acetate                | nd                        | nd                         | nd                         | nd                          | nd                         | nd                        | nd                          | nd                          | nd                        | nd                        | nd                         |
| Ethyl lactate                | 0.06 ± 0.05 <sup>d</sup>  | 0.14 ± 0.01 <sup>bc</sup>  | 0.06 ± 0.01 <sup>d</sup>   | 0.04 ± 0.00 <sup>d</sup>    | 0.18 ± 0.04 <sup>ab</sup>  | 0.13 ± 0.02 <sup>bc</sup> | 0.03 ± 0.01 <sup>d</sup>    | 0.05 ± 0.01 <sup>d</sup>    | 0.06 ± 0.01 <sup>d</sup>  | 0.12 ± 0.00 <sup>c</sup>  | 0.19 ± 0.01 <sup>a</sup>   |

|                                |                            |                             |                           |                           |                            |                           |                             |                            |                           |                            |                            |
|--------------------------------|----------------------------|-----------------------------|---------------------------|---------------------------|----------------------------|---------------------------|-----------------------------|----------------------------|---------------------------|----------------------------|----------------------------|
| Ethyl octanoate                | 0.13 ± 0.02 <sup>bcd</sup> | 0.15 ± 0.00 <sup>abcd</sup> | 0.08 ± 0.07 <sup>d</sup>  | 0.11 ± 0.00 <sup>cd</sup> | 0.21 ± 0.00 <sup>a</sup>   | 0.18 ± 0.00 <sup>ab</sup> | 0.15 ± 0.01 <sup>abcd</sup> | 0.16 ± 0.01 <sup>abc</sup> | 0.09 ± 0.01 <sup>cd</sup> | 0.21 ± 0.02 <sup>a</sup>   | 0.13 ± 0.00 <sup>bcd</sup> |
| 3OH-ethyl butyrate             | nd                         | nd                          | nd                        | nd                        | nd                         | nd                        | nd                          | nd                         | nd                        | nd                         | nd                         |
| Diethyl succinate              | 0.15 ± 0.15 <sup>b</sup>   | nd                          | nd                        | nd                        | nd                         | nd                        | 0.39 0± 0.01 <sup>a</sup>   | nd                         | nd                        | nd                         | nd                         |
| 2-phenylethyl acetate          | 0.01 ± 0.00 <sup>d</sup>   | 0.02 ± 0.00 <sup>d</sup>    | 0.02 ± 0.01 <sup>bc</sup> | 0.02 ± 0.00 <sup>cd</sup> | 0.03 ± 0.00 <sup>ab</sup>  | 0.03 ± 0.00 <sup>ab</sup> | 0.03 ± 0.00 <sup>ab</sup>   | 0.03 ± 0.00 <sup>ab</sup>  | 0.03 ± 0.00 <sup>ab</sup> | 0.03 ± 0.00 <sup>a</sup>   | 0.01 ± 0.00 <sup>e</sup>   |
| <b>Total Esters</b>            | 0.74 ± 0.25                | 1.27 ± 0.12                 | 1.04 ± 0.27               | 0.89 ± 0.34               | 2.11 ± 0.13                | 3.06 ± 0.09               | 1.77 ± 0.33                 | 1.19 ± 0.07                | 0.82 ± 0.04               | 2.74 ± 0.40                | 2.89 ± 0.43                |
| <b>Acids</b>                   |                            |                             |                           |                           |                            |                           |                             |                            |                           |                            |                            |
| Isobutyric acid                | nd                         | nd                          | 0.86 ± 0.01 <sup>b</sup>  | 0.92 ± 0.02 <sup>b</sup>  | nd                         | 0.88 ± 0.88 <sup>b</sup>  | nd                          | 1.18 ± 0.00 <sup>ab</sup>  | 1.72 ± 0.06 <sup>a</sup>  | nd                         | nd                         |
| Butyric acid                   | nd                         | nd                          | 2.27 ± 0.15 <sup>a</sup>  | 2.33 ± 0.04 <sup>a</sup>  | nd                         | 2.35 ± 0.10 <sup>b</sup>  | nd                          | 2.37 ± 0.05 <sup>a</sup>   | 2.35 ± 0.02 <sup>a</sup>  | nd                         | nd                         |
| Isovaleric acid                | 3.24 ± 0.09 <sup>f</sup>   | 6.09 ± 0.07 <sup>bc</sup>   | 3.74 ± 0.06 <sup>ef</sup> | 3.81 ± 0.02 <sup>ef</sup> | 5.65 ± 0.17 <sup>bcd</sup> | 6.38 ± 0.13 <sup>b</sup>  | 5.19 ± 0.04 <sup>cd</sup>   | 5.95 ± 0.06 <sup>bc</sup>  | 4.78 ± 0.21 <sup>de</sup> | 5.34 ± 1.07 <sup>bcd</sup> | 9.81 ± 0.59 <sup>a</sup>   |
| Hexanoic acid                  | 0.81 ± 0.03 <sup>e</sup>   | 2.31 ± 0.03 <sup>bc</sup>   | 1.64 ± 0.14 <sup>d</sup>  | nd                        | 2.57 ± 0.12 <sup>b</sup>   | 2.68 ± 0.05 <sup>ab</sup> | 2.32 ± 0.44 <sup>bc</sup>   | 1.90 ± 0.17 <sup>cd</sup>  | 0.75 ± 0.01 <sup>e</sup>  | 3.09 ± 0.22 <sup>a</sup>   | 1.56 ± 0.07 <sup>d</sup>   |
| Octanoic acid                  | 3.15 ± 0.18 <sup>f</sup>   | 5.96 ± 0.01 <sup>cd</sup>   | 5.71 ± 0.69 <sup>d</sup>  | 4.18 ± 0.20 <sup>ef</sup> | 7.75 ± 0.19 <sup>ab</sup>  | 8.63 ± 0.03 <sup>a</sup>  | 7.15 ± 0.09 <sup>bc</sup>   | 6.01 ± 0.36 <sup>cd</sup>  | 4.22 ± 0.05 <sup>ef</sup> | 8.74 ± 0.67 <sup>a</sup>   | 5.51 ± 0.35 <sup>de</sup>  |
| Decanoic acid                  | 0.63 ± 0.06 <sup>bc</sup>  | 0.38 ± 0.06 <sup>bc</sup>   | 0.54 ± 0.16 <sup>bc</sup> | 0.45 ± 0.11 <sup>bc</sup> | 0.76 ± 0.40 <sup>bc</sup>  | 2.57 ± 0.52 <sup>a</sup>  | 0.42 ± 0.03 <sup>bc</sup>   | 0.80 ± 0.00 <sup>bc</sup>  | 0.55 ± 0.01 <sup>bc</sup> | 1.11 ± 0.74 <sup>b</sup>   | 0.16 ± 0.02 <sup>c</sup>   |
| <b>Total acids</b>             | 6.25 ± 0.36                | 14.74 ± 0.18                | 14.75 ± 1.20              | 11.68 ± 0.39              | 16.74 ± 0.89               | 22.33 ± 2.80              | 15.08 ± 1.60                | 18.21 ± 0.65               | 14.38 ± 0.35              | 18.28 ± 2.71               | 17.05 ± 1.03               |
| <b>Aldehydes/cetones</b>       |                            |                             |                           |                           |                            |                           |                             |                            |                           |                            |                            |
| Diacetyl                       | nd                         | nd                          | nd                        | nd                        | nd                         | nd                        | nd                          | nd                         | nd                        | nd                         | nd                         |
| Acetoin                        | 0.53 ± 0.09 <sup>b</sup>   | nd                          | nd                        | nd                        | nd                         | nd                        | 1.69 ± 0.19 <sup>a</sup>    | nd                         | nd                        | nd                         | 0.67 ± 0.43 <sup>b</sup>   |
| Furfural                       | 0.02 ± 0.02                | nd                          | nd                        | nd                        | nd                         | nd                        | nd                          | nd                         | nd                        | nd                         | nd                         |
| Benzaldehyde                   | nd                         | nd                          | nd                        | nd                        | nd                         | nd                        | nd                          | nd                         | nd                        | nd                         | nd                         |
| Phenyl acetaldehyde            | nd                         | nd                          | nd                        | nd                        | nd                         | nd                        | nd                          | nd                         | nd                        | nd                         | nd                         |
| <b>Total aldehydes/cetones</b> | 0.55 ± 0.11                | nd                          | 0.00 ± 0.00               | 0.00 ± 0.00               | nd                         | nd                        | 1.69 ± 0.19                 | nd                         | nd                        | nd                         | 0.67 ± 0.43                |
| <b>Γ butyrolactone</b>         | 0.29 ± 0.00 <sup>a</sup>   | 0.27 ± 0.03 <sup>ab</sup>   | 0.26 ± 0.00 <sup>bc</sup> | 0.25 ± 0.01 <sup>bc</sup> | 0.25 ± 0.00 <sup>bc</sup>  | 0.25 ± 0.00 <sup>bc</sup> | 0.22 ± 0.00 <sup>d</sup>    | 0.26 ± 0.01 <sup>abc</sup> | 0.24 ± 0.01 <sup>cd</sup> | 0.27 ± 0.00 <sup>ab</sup>  | 0.27 ± 0.00 <sup>ab</sup>  |
| <b>Guaiacol</b>                | 0.06 ± 0.01 <sup>b</sup>   | nd                          | 0.03 ± 0.03 <sup>bc</sup> | nd                        | 0.03 ± 0.03 <sup>bc</sup>  | 0.05 ± 0.01 <sup>b</sup>  | nd                          | nd                         | nd                        | 0.03 ± 0.03 <sup>bc</sup>  | 0.13 ± 0.00 <sup>a</sup>   |

Data, expressed as mg L<sup>-1</sup>, are means ± standard deviations of three independent experiments. nd = not detected. Data with different superscript letters within each row are significantly different (Tukey tests: p < 0.05)
